# Supplementary material for: Wind Farm Structural Response and Wake Dynamics for an Evolving Stable Boundary Layer: Computational and Experimental Comparisons
Source: Copernicus journal article supplement (doi:10.5194/wes-2023-138), 2023-10-23
Supplement: Supplementary file [file wes-2023-138-AC1-supplement.pdf]

# 1 Response to Reviewer Comments

2 Kelsey Shaler<sup>1</sup>, Eliot Quon<sup>1</sup>, Hristo Ivanov<sup>1</sup>, Jason Jonkman<sup>1</sup>

3 <sup>1</sup>National Renewable Energy Laboratory, 15013 Denver West Parkway, Golden, CO 80401, USA

4 *Correspondence to:* Jason Jonkman ([jason.jonkman@nrel.gov](mailto:jason.jonkman@nrel.gov))

5 Thank you for supplying us with a thorough review of WES-2023-101. The comments were valuable and we tried to address  
6 them all appropriately. In addition to addressing the comments, the document has been reviewed by a professional editor to  
7 improve grammar, etc., which resulted in minor editorial changes throughout the paper.

8 Here are our responses to the specific comments, with the referee comment in green, our response in black, and changes made  
9 to the paper indented black.

## 10 Referee #1

11 *The manuscript discusses a novel comparison FAST.Farm and SOWFA-OpenFAST against measurement data. The work is*  
12 *crucial for the community and very relevant to the readers of Wind Energy Science. I find that the description of the results,*  
13 *their presentation in the figures, and the main findings (what are the main benefits of the different approaches) can be improved;*  
14 *see my list of recommendations below. I hope these suggestions can help to enhance the presentation of the findings.*

15 *\* Line 154: missing citations;*

16 Author response: Citations have been added for (Jonkman et al. (2018); Doubrawa et al. (2020)).

17 *\* Line 162-165: without discussion of the actual parameters, this paragraph is rather vague.*

18 *Author response:* The paragraph in question has been updated and combined with the previous paragraph:

19 In addition to experimental turbine load comparisons, the wake evolution between FAST.Farm and SOWFA-  
20 OpenFAST-ALM results are compared. For each turbine, the wake center position was computed using the  
21 Simulated and Measured Wake tracking algorithms. There are several wake-tracking algorithms available in the  
22 SAMWICH ToolBox. The one chosen for this work is the two-dimensional Gaussian fit model, which solves an  
23 optimization problem to determine the wake position, two-dimensional shape, and rotation parameters of a Gaussian  
24 wake-deficit function. This method is able to estimate the wake center, size, and shape. This and other wake-tracking  
25 methods available in SAMWICH Box are discussed in more detail in Quon et al. (2019). Because the wake-tracking  
26 algorithm may be sensitive to instantaneous mean wind conditions and the presence of background turbulence  
27 structures, the resulting wake center time series can include non-physical discontinuities. To minimize this, filtering  
28 is applied to remove spurious results as was done previously by Doubrawa et al. (2020). For each wake center time  
29 series, a median filter was first applied to remove the majority of non-physical spikes in the data. Any remaining  
30 spikes were removed by eliminating high gradients in the data, and then a final median filter was applied.

31 \* Figure 3: These results are very interesting. It would be great if you could find a way to better demonstrate the differences  
32 between the various models, which, in the current representation, is difficult to judge.

33 *Author response:* Quantitative comparisons between the models are made later in the paper.

34 \* Figure 4: It is stated that this figure demonstrates that the algorithm captures the wake center location accurately. This is not  
35 so clear from the figure; I would guess the wake centers should be a bit lower. Can you comment on this and how it may  
36 impact the final results?

37 *Author response:* The following parenthetical comment has been added after this statement in the text to clarify the statement:

38 (this might not be fully obvious from Figure 4, but is clearer when the wakes are shown with the ambient inflow  
39 subtracted out, which is how SAMWICH processes the wake centers)

40 \* Figure 5: It is unclear why the results for Tr01 are not normalized.

41 *Author response:* The rationale for showing the non-dimensional results (normalized by the freestream turbines Tr01 and Tr05,  
42 as described in the accompanying text) was to highlight the waked turbine response. As such, we have removed the non-  
43 dimensional subfigures for Tr01, Tr02, and Tr05.

44 \* Section 3.1: The description of figures 5, 6, and 7 is unclear as their explanation is merged, and the reference to the different  
45 figures is unclear.

46 *Author response:* The results of each figure are discussed in their own paragraphs within this section.

47 \* Figure 6: "Vertical dashed lines indicate the 3P and 6P frequencies based on the average SOWFA-OpenFAST\_AD rotor  
48 speed." --> This seems to be a typo.

49 *Author response:* Changed to:

50 Vertical shaded regions are used to show when wake steering of more than  $\pm 10^\circ$  is present (red) and when there was  
51 prominent wakening of Tr03 and Tr04 (purple).

52 \* Figure 6: Are the lower panels normalized? This is not indicated on the vertical axis

53 *Author response:* Yes, as indicated in the associated text.

54 \* Figure 6: Define the meaning of the rad bands.

55 *Author response:* The description has been fixed as indicated above.

56 \* Figure 6: Please define TS. Does this refer to time series?

57 *Author response:* Yes, TS = Time series. This was previously defined in the caption of Figure 5.

58 \* Figure 7: Make sure text and graphs are not overlapping

59 \* Figure 7: The vertical dashed lines mentioned in the caption are (nearly) invisible. Please make these clearly visible.

60 *Author response:* We have cleaned up this figure for clarity.

61 \* Figure 7: Define clearer what is defined by good and poorer agreement between model and observations. Looking at the  
62 spectra, the location of the peaks is captured better than in the top panels.

63 *Author response:* A discussion of this comparison is provided in the text, which explains where the better/worse agreement is  
64 seen.

65 \* Figure 8: Indicate vertical dashed lines.

66 *Author response:* These are 3P and 6P frequencies as stated in the figure caption.

67 \* Figure 9: Improve alignment of the different panels.

68 *Author response:* This figure has been cleaned up.

69 \* Line 260: "Though SOWFA-ALM results show more wake deflection than [typo: should be than] FAST.Farm results at 2D  
70 of Tr03, agreement 260 between the computational methods is very good at 5D downstream." --> Can this be discussed in  
71 more detail? [See left middle column]: This result suggests wake development in the different models is different.

72 *Author response:* Possible reasons for these results have been added to the text.

73 SOWFA-ALM results show more wake deflection than FAST.Farm results at 2D downstream of Tr03; FAST.Farm  
74 is not expected to accurately model wakes in the near region, but rather, the near-wake model of FAST.Farm exists  
75 so as to more accurately model the far wake. Further downstream of Tr03, agreement between the computational  
76 methods is very good at 5D downstream, as well as 3D downstream of Tr04.

77 \* Conclusion: What is meant by terms like "good" or "strong" agreement should be more clearly defined.

78 *Author response:* Clarification was made in terms of what showed the agreement. However, a more quantified result (e.g.,  
79 percent difference) is not included due to the nature of the comparisons made in the text.

80 \* Conclusion: I missed a discussion summarizing the benefits and limitations of each approach.

81 *Author response:* A discussion of SOWFA and FAST.Farm are provided in sections 2.2 and 2.3, respectively. To address this  
82 comment, the following text was added in sections 2.2, 2.3, and 4 respectively:

83 In general, the AL model requires a finer discretization and is considered higher fidelity than the AD model.

84 Compared to SOWFA, which resolves the inflow and wakes of the flow field (through the scales resolved by LES),  
85 the flow field in FAST.Farm is solved via engineering models for wave evolution, meandering, and merging atop the  
86 inflow field. The main disadvantage relative to SOWFA is the potentially lower accuracy (hence the need for  
87 validation) and the main advantage being a drastic reduction in computational expense.

88 Considering that FAST.Farm is much less computationally expensive than SOWFA-OpenFAST, this three-way  
89 validation effort provides further confidence to apply FAST.Farm to the calculation of wind turbine power production  
90 and structural loading in wind farm settings, including wake interactions between turbines.

91 Typos

92 Line 201: "and and"

93 *Author response:* Fixed.

94

95 **Referee #2**

96 Comments on the manuscript entitled “Wind Farm Structural Response and Wake Dynamics for an Evolving Stable Boundary  
97 Layer: Computational and Experimental Comparisons” by Shaler et al. submitted to Wind Energy Science.

98 In this study, the authors assessed the capability of FAST.Farm in predicting wind turbine loads and wake evolution under  
99 realistic atmospheric conditions by comparing its results with LES and measurements. Evaluating a wind energy model for  
100 real-life conditions is challenging due to the multitude of factors involved. Comments are as follows:

101 The paper contains vague statements like “good agreement”, “excellent agreement”, and etc., which require quantifiable  
102 assessments. Moreover, it is not accurate as there are discrepancies as shown in the comparison results. This should be checked  
103 throughout the paper including the abstract the conclusion section.

104 *Author response:* See our response to a similar comment from Referee # 1.

105 Regarding Figure 2: If the authors aim to compare the inflows used in FAST.Farm and LES with the measurements, these  
106 should be taken at the same position as the measurements, rather than at the turbine location.

107 *Author response:* The comparison between measured and LES inflow is included in the companion paper, which focuses on  
108 matching conditions at a single location where the profiling lidar and meteorological mast are co-located. Figure 2 shows the  
109 inflow conditions extracted from that LES that are directly used in the aero-servo-elastic turbine simulations here.

110 Accurate inflow is crucial, as emphasized by the authors. Suggestions include adding a brief description of how realistic  
111 inflow is generated in FAST.Farm and LES cases, and comparing the time series of inflow wind direction. One more question  
112 is raised: Is there a quantitative measure on the accuracy of the employed inflow?

113 *Author response:* The accuracy of the simulated inflow is discussed at length in the companion paper. An important result that  
114 is relevant to this work has been included:

115 As discussed in Quon (2023), the mean absolute errors in inflow wind speed, wind direction, and turbulence intensity  
116 are 0.19 m/s, 1.5°, and 0.031 (non-dimensional), respectively, during the study period.

117 Clarify "relative to the wind turbine" on Line 250, Page 14: Is it relative to the averaged wake center or the centerline passing  
118 the rotor center in the mean wind direction?

119 *Author response:* This has been clarified in the text:

120 Shown in Figure 9 are probability density function (PDF) distributions for the lateral and vertical wake center location  
121 for each wind turbine at various downstream distances, relative to the wind turbine location (e.g., the results for Tr02  
122 are relative to the location of Tr02).

123 The statement "A bimodal wake center position is captured for both methods at 9D downstream of Tr01, but this could be  
124 due to deficiencies in the wake tracking algorithm when wake breakdown occurs." on line 255 page 14: the authors need to  
125 clarify whether it is caused by the wake tracking algorithm before drawing conclusions from the figure.

126 *Author response:* Upon closer inspection, this bimodal response is due to the changing wind direction and resulting change in  
127 yaw, which is supported by the yaw misalignment values in Figure 2. The text has been updated to reflect this:

128 A bimodal wake center position is captured for both methods at 9D downstream of Tr01. This is due to the changing  
129 wind direction and resulting change in turbine yaw misalignment (ranging between +5 and -10 degrees), which has a  
130 more pronounced impact on the wake location further downstream of the turbine and is seen developing by 5D  
131 downstream of Tr01.

132 Following from the last comment: does the employed 2D Gaussian fit model work when there are superpositions of wakes?

133 *Author response:* When the wakes from multiple rotors overlap, SAMWICH does not track the wake of each rotor separately.  
134 Rather, the wake center of the "superimposed" wakes is tracked by SAMWICH. While superimposed wakes are most likely  
135 not 2D Gaussian in shape, the post-processing with SAMWICH is done consistently across the various results that are  
136 compared in this work, and so, the comparison is considered valid.

137 Typo on Line 160 page 7: "Guassian".



# Wind Farm Structural Response and Wake Dynamics for an Evolving Stable Boundary Layer: Computational and Experimental Comparisons

Kelsey Shaler<sup>1</sup>, Eliot Quon<sup>1</sup>, Hristo Ivanov<sup>1</sup>, and Jason Jonkman<sup>1</sup>

<sup>1</sup>National Renewable Energy Laboratory, Colorado, USA

**Correspondence:** Jason Jonkman (jason.jonkman@nrel.gov)

**Abstract.** The wind turbine design process requires performing thousands of simulations for a wide range of inflow and control conditions. ~~This~~, which necessitates computationally efficient yet time-accurate models, especially when considering wind farm settings. To this end, FAST.Farm is a ~~dynamic-wake-meandering-based-midfidelity~~ dynamic-wake-meandering-based mid-fidelity engineering tool developed by the National Renewable Energy Laboratory targeted at accurately and efficiently predicting wind turbine power production and structural loading in wind farm settings, including wake interactions between turbines. This work is an extension to a study ~~into~~ that addressed constructing a diurnal cycle evolution based on experimental data (Quon (2023)). Here, this inflow is used to validate the turbine structural and ~~wake-meandering~~ wake-meandering response between experimental data, FAST.Farm simulation results, and high-fidelity large-eddy simulation results from coupled ~~SOWFA-OpenFAST~~ Simulator fOr Wind Farm Applications (SOWFA)-OpenFAST. The validation occurs within the nocturnal stable boundary layer when corresponding meteorological and turbine data were available. To that end, we compared the load results from FAST.Farm and SOWFA-OpenFAST ~~are compared~~ to multi-turbine measurements from a subset of a full-scale wind farm. Computational predictions of blade-root and tower-base bending loads are compared to 10 ~~-minute~~ minute statistics of strain gauge measurements during 3.5 ~~hour~~ hours of the evolving stable boundary layer, generally with good agreement. This time period coincided with an active ~~wake-steering~~ wake-steering campaign of an upstream turbine, resulting in time-varying yaw positions of all turbines. Wake meandering was also compared between the computational solutions, generally with excellent agreement. Simulations were based on ~~the use of~~ a high-fidelity precursor constructed from inflow measurements and using state-of-the-art mesoscale-to-microscale coupling.

*Copyright statement.* The U.S. Government retains and the publisher, by accepting the article for publication, acknowledges that the U.S. Government retains a nonexclusive, paid-up, irrevocable, worldwide license to publish or reproduce the published form of this work, or allow others to do so, for U.S. Government purposes.

# 1 Introduction

The wind turbine design process requires performing thousands of simulations for a wide range of inflow and control conditions to capture the structural loads experienced by the turbine over its lifetime. This ~~process~~ necessitates computationally efficient yet time-accurate models. When turbines are placed in wind farms, structural loading is also driven by wakes from neighboring turbines and from ~~wind-farm-wide~~ ~~wind-farm-wide~~ controls strategies, such as wake steering (Fleming et al. (2019, 2020)). To this end, FAST.Farm is a dynamic wake meandering (DWM)-based ~~midfidelity~~ ~~mid-fidelity~~ engineering tool developed by the National Renewable Energy Laboratory (NREL) targeted at accurately and efficiently predicting wind turbine power production and structural loading in wind farm conditions, including farm-wide atmospheric inflows, wake interactions between turbines, and farm-wide control (Jonkman and Shaler (2021)).

Previous FAST.Farm studies ~~show~~ ~~have shown~~ the similarities and differences between FAST.Farm and high-fidelity large-eddy simulations (LES) for rigid and flexible turbines, including wake development and meandering, power performance, and structural loading (Jonkman et al. (2018); Shaler et al. (2019); Shaler and Jonkman (2021)). The first validation of FAST.Farm against measured data took place during the Scaled Wind Farm Technology (SWiFT) benchmark study (Doubrawa et al. (2020)), which showed that ~~underperforming~~ ~~under-performing~~ aspects of the simulated wakes were primarily a result of inaccuracies in the inflow and not related to wake modeling itself. But this study did not consider interaction between multiple wind turbines or structural loads. Structural loads calculated by FAST.Farm in single wake conditions (where one turbine is directly upstream of a second turbine) were validated against measurement data from the Alpha Ventus wind farm (Kretschmer et al. (2021)), which showed the importance of wake-added turbulence in ~~low-ambient-turbulence~~ ~~low-ambient-turbulence~~ conditions. In another single wake condition, FAST.Farm was further verified and validated against other engineering models, LES, and measured data from the DanAero wake benchmark study (Asmuth et al. (2022)), which further highlighted the importance of accurate inflow characterization on the turbine response. These validation studies considered two turbines. The only validation of FAST.Farm against measured data with more than two turbines that has been done to date involved ~~the validation of~~ ~~validating~~ FAST.Farm against five-turbine generator power, rotor speed, and blade pitch results from supervisory control and data acquisition measurements (Shaler et al. (2020)). Despite this verification and validation work, the loads and ~~wake-meandering results for multiturbine interactions has~~ ~~wake-meandering results for multi-turbine interactions have~~ yet to be validated.

The objective of this work is to assess the ability of FAST.Farm to accurately predict ~~wind~~ turbine loads and wake evolution in a small wind farm based on realistic atmospheric conditions, specifically within a ~~nonstationary~~ ~~non-stationary~~ stable boundary layer. This is done via a three-way comparison between FAST.Farm simulations, high-fidelity LES simulations using the coupled ~~SOWFA-OpenFAST~~ ~~Simulator fOr Wind Farm Applications (SOWFA)-OpenFAST~~ tool, and ~~multiturbine~~ ~~multi-turbine~~ measurements from a small full-scale wind farm, with the simulations driven by a high-fidelity LES precursor using SOWFA of a diurnal cycle derived from measurement-driven mesoscale-to-microscale-coupling (MMC) techniques. The development of the high-fidelity LES precursor is detailed in a companion paper (Quon (2023)). FAST.Farm and SOWFA-OpenFAST simulations are performed for a 3.5 ~~-hour~~ ~~hour~~ nighttime period when atmospheric and turbine data are available, and compared to



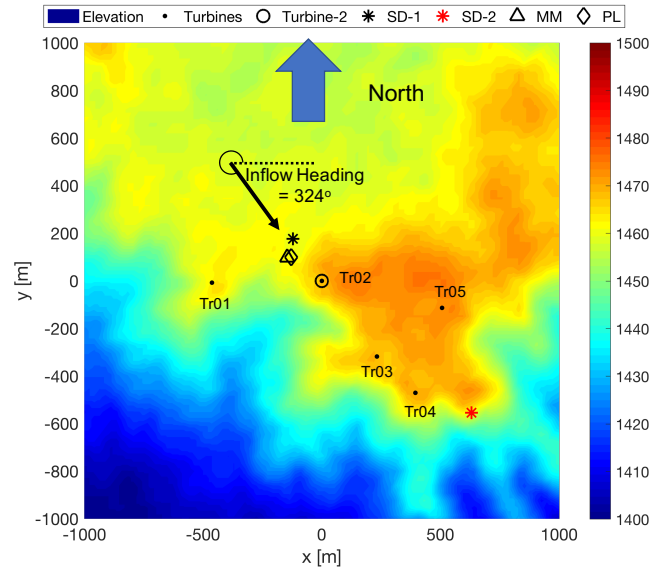

**Figure 1.** Wind farm layout. ~~Tr01—Tr05~~ Tr01–Tr05 indicate the wind turbine locations. Contours show elevation above sea level in meters. The x- and y-axis are easting and northing coordinates, respectively, centered at Tr02. The profiling Doppler lidar (PL) and meteorological mast (MM) are indicated by the diamond and triangle symbols. Sodar (SD) locations are indicated by stars but not used in this work.

55 experimental data from a cluster of five GE 1.5 MW turbines, as shown in Figure 1. This turbine has a hub height of 80 m and  
 60 rotor diameter of 77 m and a controller supporting variable speed below rated and collective blade pitch-to-feather regulation  
 above rated. The data are collected from the turbines located at the northwest corner of a larger wind farm. ~~10-minute~~ Ten  
minute averages, standard deviations, and power spectra are compared for generator power, rotor speed, and blade-root flap-  
 wise and edgewise bending moments. Additionally, wake center meandering is compared between FAST.Farm and SOWFA  
 60 results for all turbines. A portion of the time period studied involved active wake steering of Tr02.

## 2 Approach and Methodology

This section provides an overview of FAST.Farm, SOWFA, and experimental measurements, followed by a description of the  
 validation case that was used in this study.

### 2.1 Data Measurements

65 ~~Data measurements were used~~ We applied data measurements to construct the inflow domain used in the FAST.Farm and  
 SOWFA-OpenFAST simulations, and ~~also for validation of~~ for validating the FAST.Farm and SOWFA-OpenFAST structural  
 loads results.

### 2.1.1 Inflow Conditions

To measure the wind inflow conditions, a 60 ~~-m-m~~ meteorological mast and a WindCube-V2 profiling Doppler lidar are available approximately 160 ~~-m-m~~ upstream of turbine Tr02 along the predominant wind direction. An ultrasonic anemometer on the meteorological mast provides 20 ~~-Hz-Hz~~  $u$ -,  $v$ -, and  $w$ -velocity components; additional sensors provide virtual temperature, pressure, and humidity. The profiling Doppler lidar provides 1 ~~-Hz-Hz~~ wind speed and wind direction data from 40 ~~-to~~ 260 ~~-m-m~~ heights with an interval of 20 m. A detailed list of all inflow measurements used to construct the high-fidelity inflow is provided in Quon (2023), which also provides more information on the inflow wind properties, measurements, ~~wake steering~~ wake-steering campaign details, and why this time period was selected.

### 2.1.2 Wind Turbine Measurements

Two sets of wind turbine measurements are used for validation in this study. The first contained rotor power measurements from the supervisory control and data acquisition (SCADA) system of all five turbines. ~~This data was~~ These data were collected at 1 Hz and post-processed into 10 ~~-minute-minute~~ averages. The second set of measurements contained more comprehensive data from Tr02 and Tr03. These two turbines were instrumented to measure mechanical loads based on guidance from ~~IEC International Electrotechnical Commission~~ IEC International Electrotechnical Commission 61400-13, Edition 1. Turbine controller outputs such as rotor power, torque, and speed were provided at 1 Hz and directly integrated with the independent instrumentation into the data acquisition system (~~DAS~~). All data ~~was were~~ recorded at 50 Hz and stored as ~~10-minute-10 minute~~ files. In this study, blade-root and tower-base bending moments were extracted as quantities of interest. The blade-root bending moments were measured 1,500 mm from the face of the pitch ring. Calibration and scaling ~~was were~~ done using a slow rotor roll procedure at two different pitch angles with the blade overhang moment. Tower-base strain gauges were located roughly 6-m above the tower-base flange. A yaw sweep procedure in conjunction with the rotor overhang moment was used to calculate the scale factor. The loads measurement campaign took place from December 10, 2019, through February 16, 2020. However, this work focuses on the 3.5 ~~-hour-hour~~ period between 7 : 30-11 : 00 UTC on December 26, 2019, as detailed in Quon (2023).

For complete details on the experimental loads campaign, see Ivanov et al. (2021).

### 2.2 ~~Large-Eddy Simulations~~ Large-Eddy Simulations Setup

~~High-fidelity~~ We performed high-fidelity LES of the field campaign ~~were performed~~ using SOWFA. This software is based on OpenFOAM version 6 and solves the momentum and potential temperature transport equations for a dry, incompressible flow with buoyancy effects represented by the Boussinesq approximation. For the turbine simulations, turbines are represented by actuator disk (AD) and actuator line (AL) models in two distinct simulations. The turbine aerodynamics are loosely coupled to OpenFAST (NREL (2021a)), in which SOWFA passes flow-field velocities to OpenFAST and OpenFAST passes blade forces to SOWFA. (We refer to the coupled software as SOWFA-OpenFAST herein.) The OpenFAST blade forces are represented within SOWFA as a distributed body force, the distribution of which is dictated by a uniform Gaussian kernel with width  $\epsilon$ . This width is generally chosen to be as small as possible while maintaining numerical stability. For the AD model, the blade

100 forces are distributed with a constant  $\epsilon = 3.5$  m and then spread over the entire rotor disk; for the AL model, the blade forces are distributed as a function of blade chord, with  $\epsilon/c = 1.6$ . In general, the AL model requires a finer discretization and is considered higher fidelity than the AD model.

SOWFA simulations were performed in a  $4 \text{ km} \times 4 \text{ km} \times 1 \text{ km}$  computational domain. The precursor simulation was run with uniform spatial discretization of 10 m and temporal discretization of 0.5 seconds. Each of the two simulations with turbines was initiated from the diurnal precursor simulation at 07 : 30 UTC on December 26, 2019. In the AD simulation, mesh refinement was added at 2.5 rotor diameters (D) upstream and laterally from all turbines, and extending 15D downstream of Tr04 in the mean wind direction of  $337^\circ$ . In the refinement region, the spatial discretization was reduced to 5 m and the temporal discretization was reduced to 0.25 seconds. In the AL simulation, the initial refinement was expanded to 10D upstream and laterally 20D downstream. An additional refinement level was added around each turbine that extending-extended 2D upstream and laterally, and 5D downstream. The finest grid spacing was 2.5 m and the temporal discretization was further reduced to 0.1 seconds.

For further details on the SOWFA model and how it was used to generate the inflow, see the companion paper of Quon (2023).

### 2.3 FAST.Farm Simulations Setup

115 FAST.Farm is a multi-physics-multi-physics engineering tool that accounts for wake interaction effects on wind turbine performance and structural loading within wind farms. FAST.Farm is an extension of the NREL software's OpenFAST, which solves the aero-hydro-servo-elasto dynamics of individual turbines. FAST.Farm extends this analysis to include wake deficits, advection, deflection, meandering, and merging for wind farms. FAST.Farm is based on the DWM model (Larsen et al. (2008)), but expands on it to address many limitations of past DWM implementations. Using this method, the wake deficit of each turbine is computed using the steady-state thin shear layer approximation of the Navier-Stokes equations and the wake is perturbed with a turbulent freestream to capture wake meandering. Wake merging is modeled using a superposition method (Jonkman and Shaler (2021)).

125 Compared to SOWFA, which resolves the inflow and wakes of the flow field through the scales resolved by LES, the flow field in FAST.Farm is solved via engineering models for wave evolution, meandering, and merging atop the inflow field. The main disadvantage of FAST.Farm relative to SOWFA is the potential lower accuracy (hence the need for validation) and the main advantage being a drastic reduction in computational expense.

FAST.Farm simulations were performed using the same precursor generated in SOWFA and used for the SOWFA-OpenFAST simulations. To accomplish this step, the SOWFA precursor simulation was sampled at the FAST.Farm low- and high-resolution spatial and temporal sampling frequencies. The high- and low-resolution time steps were at 0.5 seconds and 2 seconds, respectively. High- and low-resolution spatial discretization was 5 m and 10 m, respectively. The low-resolution spatial domain was sized at  $2045 \text{ km} \times 1100 \text{ km} \times 280 \text{ km}$ , and the high-resolution spatial domains were sized at  $\pm 1.5D \times \pm 1.5D \times 3.6D$ , centered around each turbine. Rather than calibrating the wake-related FAST.Farm parameters based on the measured data or SOWFA-OpenFAST results, default values were used.

## 2.4 OpenFAST Model Setup

135 In the OpenFAST model of each wind turbine, aerodynamic, structural, and controller components were enabled. For FAST.Farm  
simulations, OpenFAST computes the rotor aerodynamics using the blade-element-momentum (~~BEM~~) ~~theory in~~ theory in the  
AeroDyn15 module with advanced corrections, including unsteady aerodynamics. For SOWFA simulations, OpenFAST com-  
140 puts the blade-element part while the induction is accounted for within SOWFA. For all simulations, OpenFAST computes  
the wind turbine structural response using the ElastoDyn module, which models the flexibility of the blades, drivetrain, and  
tower with a combined multi-body and modal structural approach. The controller was ~~modelled~~ modeled using the Reference  
Open-Source Controller (ROSCO, NREL (2021b)), and is described further in Shaler et al. (2020). A separate controller model  
was used for Tr02, as described in Shaler et al. (2020). Tower influence on the flow and nacelle blockage, as well as drag on  
the tower, were not considered.

## 2.5 Validation Cases

145 ~~Shown in~~  
Figure 2 ~~are shows~~ the time-varying yaw positions of each turbine ; measured and simulated inflow velocities at Tr02 inflow  
conditions from the nacelle anemometer and the turbine simulations (sampled at hub height, just upstream of the rotor); turbine  
yaw positions from the nacelle yaw encoder; and Tr03; and measured shear exponent - the estimated shear exponent from the  
meteorological mast. The yaw position of each turbine is directly specified through the user-defined controller option in the  
150 ServoDyn module of OpenFAST, ~~and~~ thus no distinction is made between the computational methods and measurements in  
Figure 2. Yaw positions are centered about a nominal value, such that a yaw position of  $0^\circ$  corresponds to no yaw misalign-  
ment when the inflow wind is primarily at  $337^\circ$ . Time-varying yaw angle settings for Tr02 and Tr03 values were taken directly  
from experimental data. ~~Due to~~ Because of a lack of measurements, Tr04 values were set to be the same as Tr03 values and  
Tr01 and Tr05 were set to have no yaw misalignment relative to the incoming flow. For more details on these measurements  
155 and corresponding uncertainty, see Fleming et al. (2020). The turbine inflow velocities for Tr02 and Tr03 come from experi-  
mental measurements and simulations results. The ~~experimental measurements were taken from the lidar collocated with the~~  
~~meteorological mast. The~~ FAST.Farm and SOWFA-OpenFAST results were taken from the *InflowWind* module of OpenFAST  
generated at each turbine, computed at the turbine hub location. This simulation output includes wake deficits from upstream  
turbines, and for SOWFA-OpenFAST only, the induction zone of the turbine whose inflow wind is being output. While there  
160 is reasonable agreement between the experimental and FAST.Farm results, the SOWFA-OpenFAST results are consistently  
lower, especially for Tr03. This is due to the ~~the~~ induction zone upstream of the turbines captured by SOWFA, which reduces  
the inflow velocity experienced by the wind turbines. The time-varying shear exponent was computed using profiling lidar data  
and based on changes to the wind speed between heights of 40 and 120 m. These measurements show a wide range of shear  
exponents during this time period, and at times large gradients, indicating that the background conditions are not stationary ~~as~~  
165 ~~discussed in Quon (2023)~~. This is important when comparing simulated results and measured data, and this ~~nonstationarity~~  
non-stationarity can have a significant impact on the ability of a code to accurately capture rotor response. As discussed in

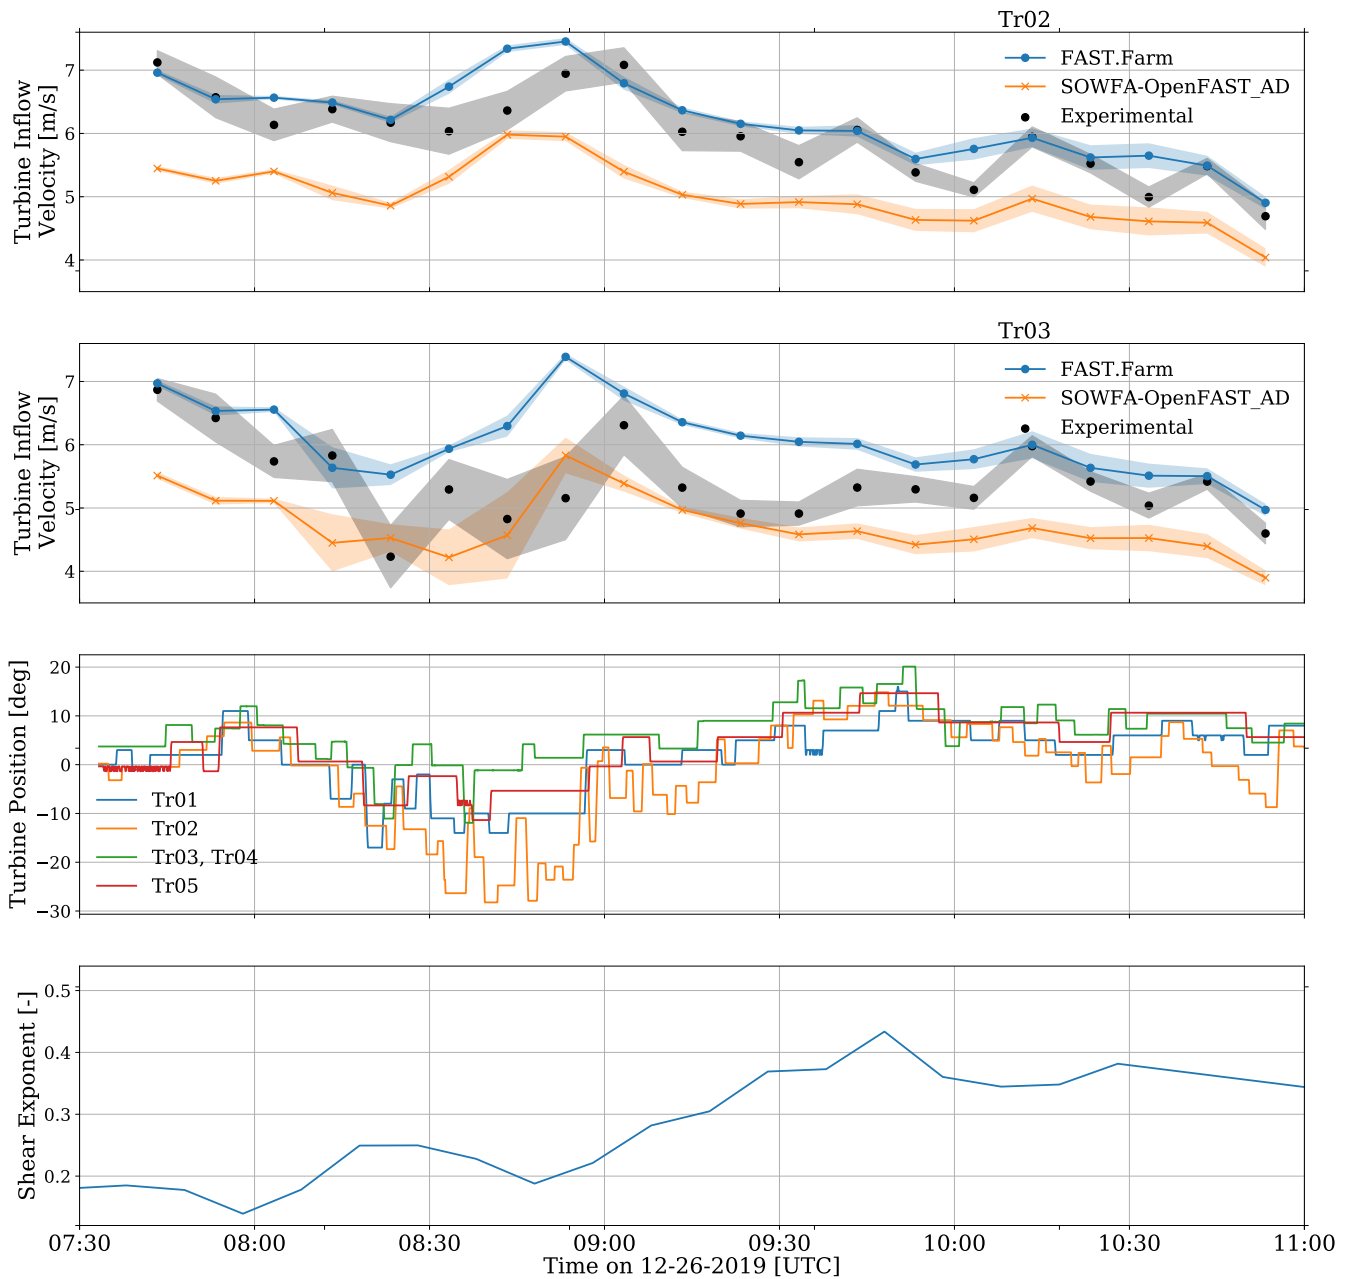

**Figure 2.** Time-varying results for measured and simulated inflow velocities at Tr02 (top row) and Tr03 (2nd-second row), turbine yaw position (3rd-third row), and ambient shear exponent (bottom). Yaw position and shear exponent results are from measurements. Dots in inflow velocity results show 10-minute averages and bands extend to  $\pm 1$  standard deviation from the mean.

Quon (2023), the mean absolute errors in inflow wind speed, wind direction, and turbulence intensity are 0.19 m/s, 1.5°, and 0.031 (non-dimensional), respectively, during the study period.

Two-dimensional-flow visualizations at hub height of the five turbine simulations are shown in Figure 3. Each row contains

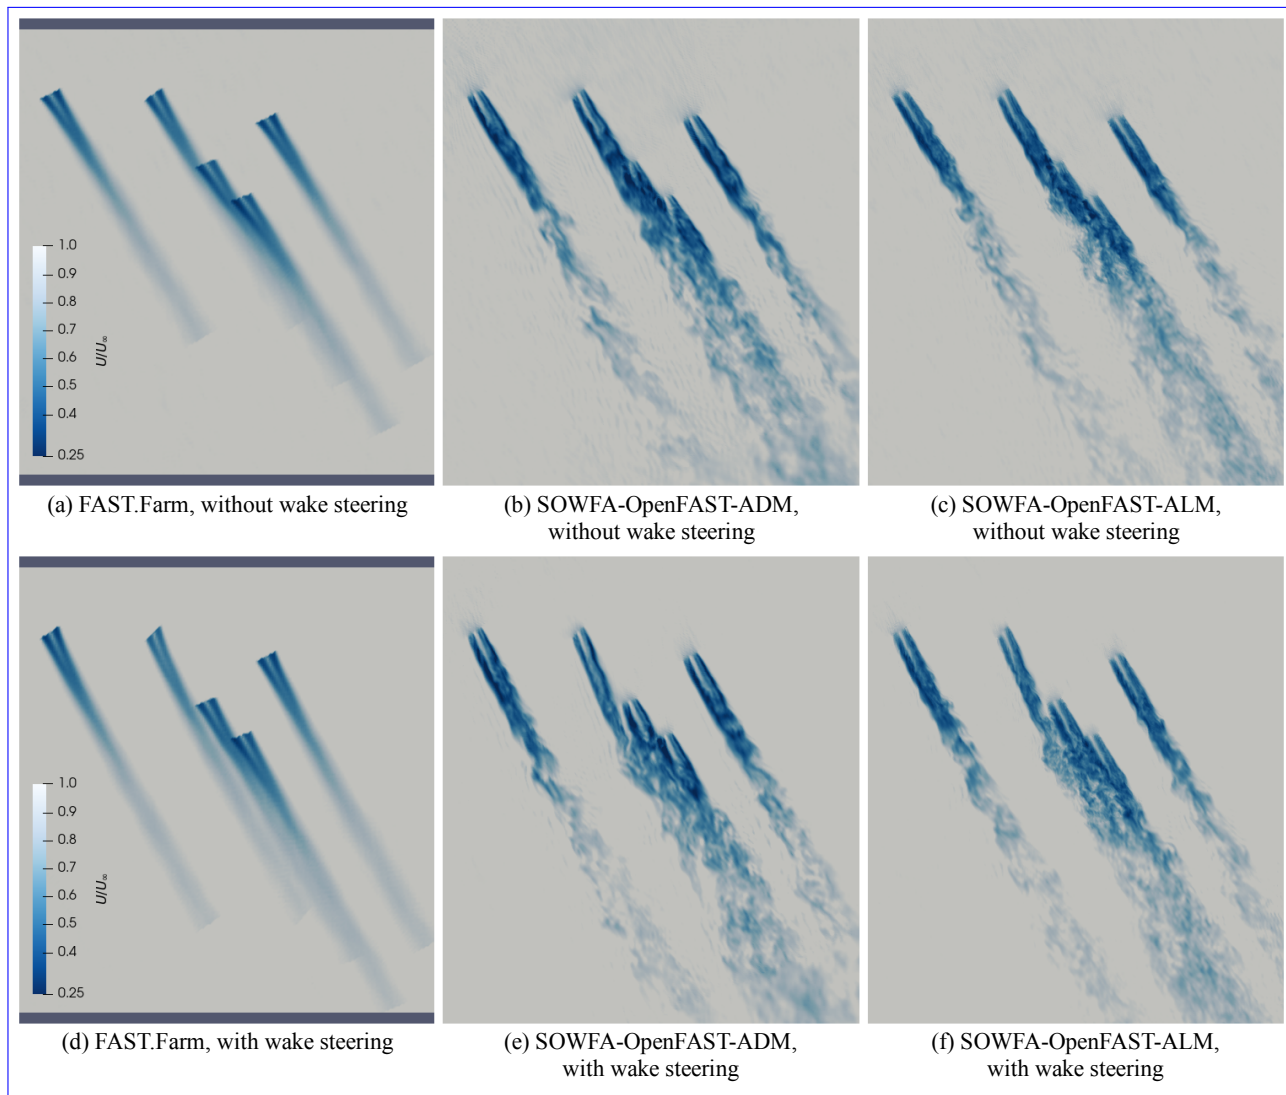

**Figure 3.** Time-averaged (FAST.Farm) and instantaneous (SOWFA) two-dimensional flow visualization at 8:30 UTC (without wake steering) and 8:49 UTC (with wake steering), sampled at hub height and colored by velocity magnitude normalized by the mean horizontal wind speed.

170 results from FAST.Farm (shown as a time average), SOWFA-OpenFAST-ADM (shown as an instantaneous snapshot), and SOWFA-OpenFAST-ALM simulations (shown as an instantaneous snapshot), both without (top) and with (bottom) wake

steering. The overall wake trajectory and magnitude is consistent between simulations. Such comparisons have been investigated more in previous studies (Jonkman et al. (2018); Doubrawa et al. (2020)).

In addition to experimental turbine ~~loads comparisons,~~ load comparisons, the wake evolution between FAST.Farm and SOWFA-OpenFAST-ALM results are compared. For each turbine, the wake center position was computed using the Simulated and Measured Wake Identification and CHaracterization ToolBox (SAMWICH Box, Quon (2017)), an open-source, Python-based library of ~~wake-tracking~~ wake-tracking algorithms. There are several wake-tracking algorithms available in ~~SAMWICH box~~ the SAMWICH ToolBox. The one chosen for this work is the ~~2D-Guassian~~ two-dimensional Gaussian fit model, which ~~is a function-based wake identification method that~~ solves an optimization problem ~~for to determine~~ the wake position, two-dimensional shape, and rotation parameters of a Gaussian wake-deficit function. This method is able to ~~detect~~ estimate the wake center, ~~edgesize,~~ and shape. This and other ~~wake-tracking~~ wake-tracking methods available in SAMWICH Box are discussed in more detail in Quon et al. (2019).

~~Due to the imperfect nature of the wake-tracking algorithm~~ Because the wake-tracking algorithm may be sensitive to instantaneous mean wind conditions and the presence of background turbulence structures, the resulting wake center time series ~~often includes nonphysical spikes~~ can include non-physical discontinuities. To minimize this, filtering is ~~required~~ applied to remove spurious results as was done previously by Doubrawa et al. (2020). For each wake center time series, a median filter was first applied to remove ~~most nonphysical~~ the majority of non-physical spikes in the data. Any remaining spikes were removed by ~~removing~~ eliminating high gradients in the data, and then a final median filter was applied. ~~The final results of this process are show relative to the unfiltered wake center position time series results. Time series showing the difference in unfiltered (before) versus filtered (after) predicted wake center location.~~

An instantaneous snapshot visualizing the wake center locations is shown in Figure 4. Here, the u-velocity is shown in a plane that is roughly parallel to the un-yawed rotor planes, wherein the black circles represent the projected rotor locations; white circles indicate the region searched by the algorithm to identify the wake center; and a white x shows the calculated wake center, after all filtering has been applied. With visual inspection, these x's appear to be roughly in the center of the wake area and indicate that the wake centers are accurately calculated by the algorithm (this might not be fully obvious from Figure 4, but is clearer when the wakes are shown with the ambient inflow subtracted out, which is how SAMWICH processes the wake centers).

### 3 Results

The results of this ~~paper article~~ are broken up into two parts. ~~In the first~~ First, time-series and power spectral density (PSD) data are compared between experimental measurements and all computational models. In all time series plots, the dots represent 10 ~~-minute~~ minute averages and the shaded regions represent  $\pm 1$  standard deviation for that 10 ~~-minute~~ minute period. Because ~~this these~~ time series data ~~was were~~ collected during a ~~wake steering~~ wake-steering campaign for Tr02, vertical shaded regions are used to show when wake steering of more than  $\pm 10^\circ$  is present (red) and ~~also~~ when there was prominent waking of Tr03 and Tr04 (purple). All PSD plots are focused on key excitation and natural frequencies and do not show the full y-axis range

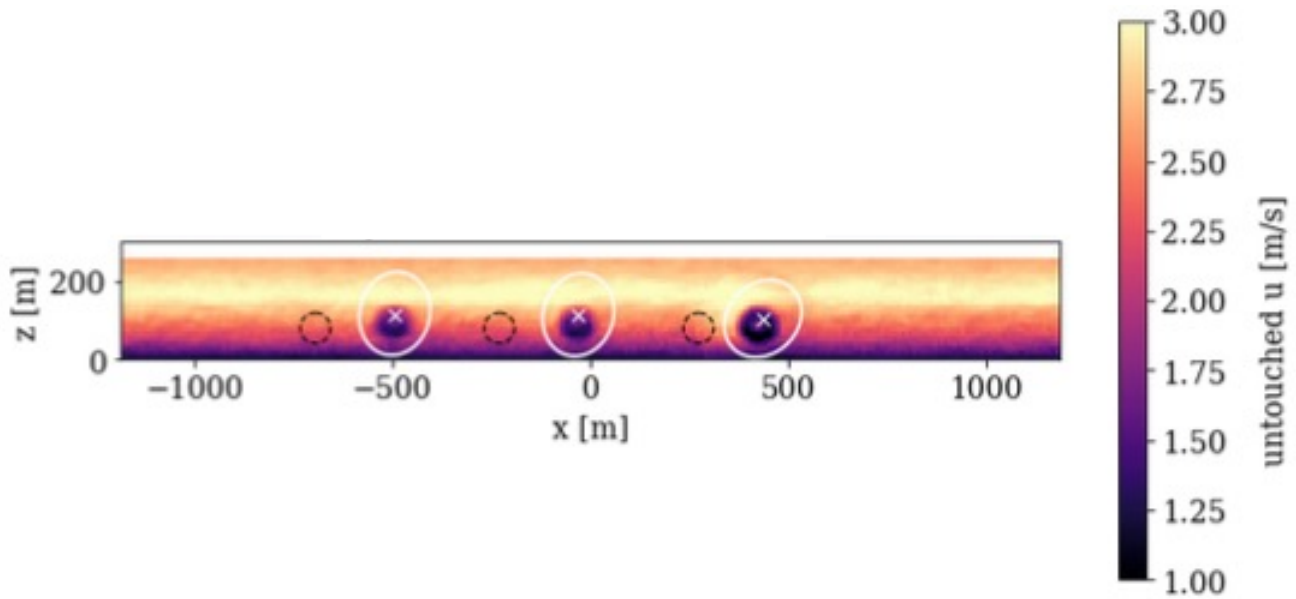

**Figure 4.** Instantaneous snapshot of FAST.Farm u-velocity located 2D downstream of Tr1, Tr2, and Tr5. Black circles show the projected location of the rotor plane. White circles show the area searched for calculating the wake center of the corresponding wind turbine wake, with the white x showing the calculated wake center location at the given time stamp (1 hour into the simulation).

reached (mostly indicative of the mean values whose peak is not shown). In the second part, wake center tracking is used to compare the approximate time-varying wake center position of Tr02, Tr03, and Tr04 for all computational methods.

### 3.1 Wind Turbine Response

The response of the turbine array for the case study defined in Quon (2023) has been simulated with three different model fidelities. Figure 5 shows the time-series plots of rotor power for all computational methods and experimental measurements. Here, the experimental data is taken from SCADA measurements; therefore, results are shown for all five turbines, but without the bands for standard deviation that could not be derived from the 10-minute averages. Tr04 has been shown for completeness but excluded from the analysis because, unlike the other wind turbines, its performance on this day deviated from its operational power curve in both Region 2 and 3. Additionally, both dimensional (Figure 5a) and non-dimensional (Figure 5b) results are shown. For the non-dimensional plots, Tr01 and Tr05 remain dimensional, and the remaining turbines were non-dimensionalized by the corresponding average 10-minute mean value of Tr01 and Tr05 ( $\frac{\bar{x}_{Tr01} + \bar{x}_{Tr05}}{2}$ ). When comparing the rotor power of the un-waked turbines (Tr01, Tr02, and Tr05), a primary observation is that at higher wind speeds FAST.Farm tends to have the highest rotor power for a given 10-minute period, followed by SOWFA-OpenFAST\_AD and then SOWFA-OpenFAST\_AL. As the wind speed reduces, this order reverses, with SOWFA-OpenFAST\_AL results tending to predict the highest power and FAST.Farm predicting



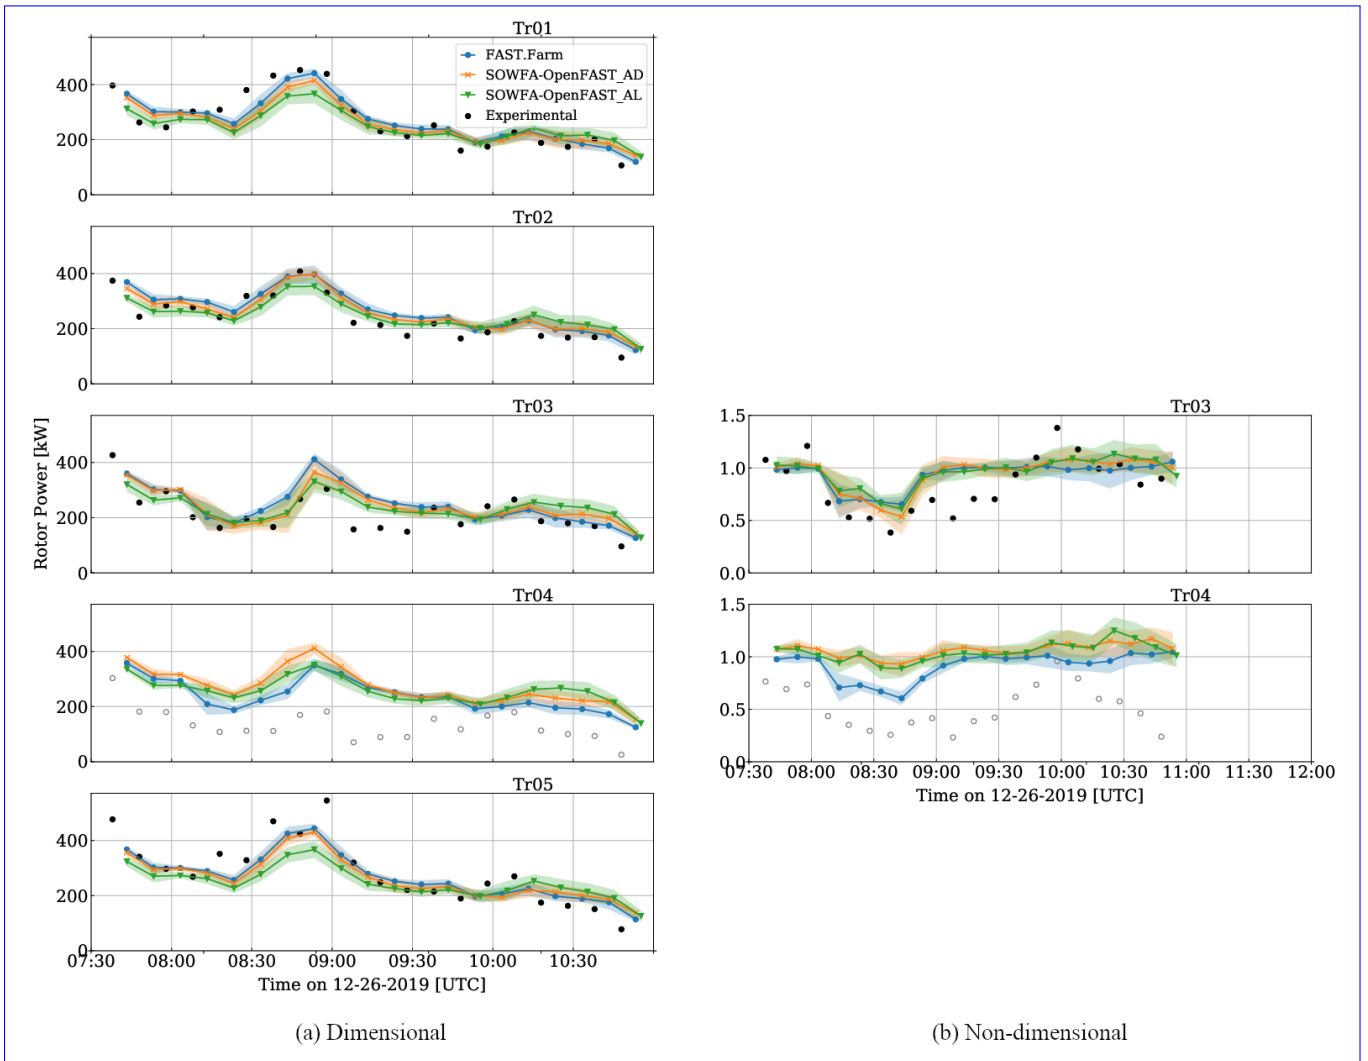

**Figure 5.** Time-series (TS) results for rotor power for all computational methods and experimental results. Dots show 10-minute averages and bands extend to  $\pm 1$  standard deviation from the mean. Results from each wind turbine are shown in separate sub-figures. Experimental results for Tr04 are invalid.

220 the lowest power. There is particularly strong agreement between FAST.Farm and SOWFA-OpenFAST\_AD results for Tr01 and Tr05, turbines for which wake steering is never used. When compared to the experimental results, there is overall strong agreement with the computational results, though some time periods show a higher error. In particular, the experimental power of Tr05 is significantly higher than the computation at a few 10-minute periods before 9 : 00 UTC. This is expected to be caused by an unmeasured un-measured spatial variation of the inflow (horizontal gradient). Note that the strongest agreement

225 between the computational and experimental results is for Tr02. Though this was the turbine for which wake steering was

used, the precise yaw angle was prescribed to match experimental measurements, which is likely the reason for such close agreement, combined with the turbine being ~~unwaked~~un-waked.

When comparing the response of waked turbines (Tr03 and Tr04), discrepancies vary based on how many wakes are impacting the turbine. For Tr03, the same relative trends are ~~seen~~observed between the computational methods, with FAST.Farm predicting the highest rotor power at a higher wind speed and ~~and~~ SOWFA-OpenFAST\_AL predicting the highest rotor power at lower wind speeds. Additionally, there is strong agreement of all models and experimental results for most of the time period, with larger discrepancies at the lowest wind speeds. For Tr04, there are significant discrepancies between all computational models and experimental data for the duration of the time series, and ~~also~~ large discrepancies between the computational models during the period with strong waking. The differences in computational results during the period with strong waking is likely ~~due to~~because of the differences in wake breakdown or wake position. In particular, FAST.Farm predicts the lowest rotor power in this region, which is contrary to the ~~unwaked~~un-waked turbine results. This lower rotor power is likely due to a stronger wake that has not broken down as quickly as the wake from the SOWFA-OpenFAST results. At ~~this time~~the time these simulations were performed, FAST.Farm ~~does~~did not have a wake-added turbulence model or a curled wake model. The lack of a curled wake model may lead to differences in wake shape and deflection, resulting in more of the wake from Tr03 impacting that of Tr04. Both of these points are investigated in Section 3.2. FAST.Farm is expected to be inaccurate in waked conditions for turbine Tr04 ~~due to~~because of its close proximity to Tr03 (223 m), which is less than 3D, due to the near-wake correction used in FAST.Farm that is ~~only~~ implemented to approximate the effect of pressure recovery on the far-wake solution.

~~Shown in~~ Figures 6(a,b,c) ~~are~~show time-series results for rotor power, torque, and speed for all computational results and experimental measurements (not SCADA) for Tr02 and Tr03. Results for Tr02 are presented dimensionally, ~~while~~whereas results for Tr03 are non-dimensionalized by the corresponding 10-minute average of Tr02. For rotor power, these time-series results are very similar to those in Figure 5 but not exact ~~due to~~because of different measurement instruments. Note that although rotor power and speed may be directly measured, the reported torque has uncertainty associated with the strain gage measurement as well as the estimated gearbox and generator loss factor assumed during calibration. The non-dimensionalization of Tr03 results allow for a clearer view of the effect of wake interaction, with a strong dip in all quantities during the period of wake interaction, shaded by purple. Comparable results are ~~seen~~observed between all methods for all quantities, following the trends described for Figure 5. For all quantities, experimental measurements show higher standard deviations throughout the time series.

~~Shown in~~ Figures 7(a,b) ~~are~~show time-series results for blade-root flapwise and edgewise bending moments for all computational results and experimental measurements for Tr02 and Tr03. These results show ~~overall~~ strong agreement between all computational results and experimental measurements, both for the means and standard deviations. Relative trends between the computational results are the same as for rotor power, with FAST.Farm predicting the highest loads at the higher wind speeds and SOWFA-OpenFAST\_AL predicting the highest loads at the lower wind speeds. For the flapwise bending moment, the wake impact on Tr03 is clearly visible, with all normalized results reduced below 1, as well as increased standard deviations, which ~~is~~are generally picked up well by all computational models. The PSD response also compares well for both wind turbines for the ~~"good agreement"~~"good agreement" time period, with clear spikes in all results at the 1P frequency, though

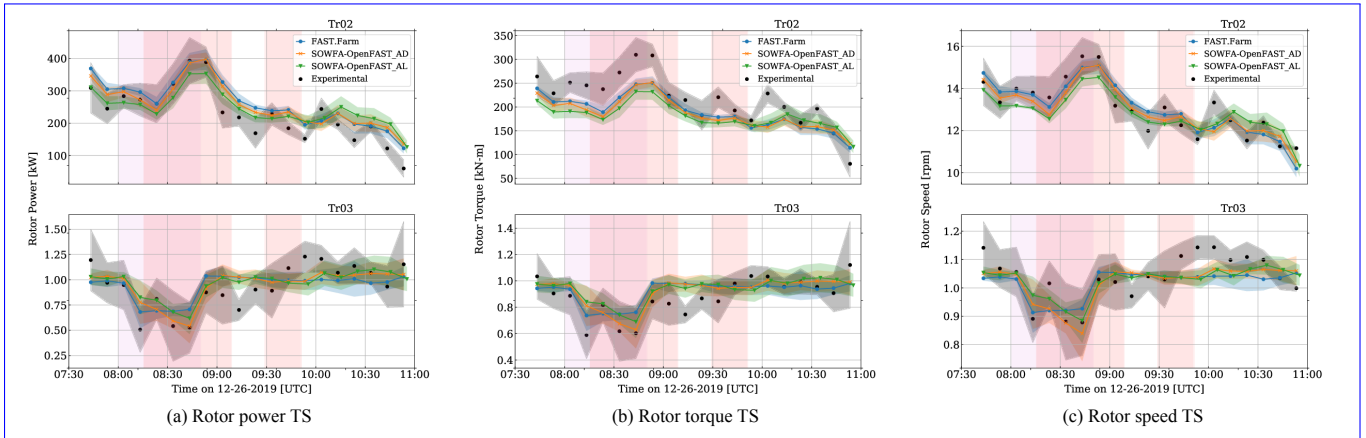

**Figure 6.** Time series results for rotor power, torque, and speed for all computational methods and experimental results (not SCADA). Dots show 10-minute-10 minute averages and bands extend to  $\pm 1$  standard deviation from the mean. Results from each wind turbine are shown in separate subfigures. Vertical dashed lines indicate the 3P shaded regions are used to show when wake steering of more than  $\pm 10^\circ$  is present (red) and 6P frequencies based on the average SOWFA-OpenFAST\_AD rotor speed when there was prominent waking of Tr03 and Tr04 (purple).

the computational results show higher spikes for both turbines. For the "poorer agreement" time period, the results are again comparable, but Tr03 shows much higher spectral content at 1P for the computational results, as well as a spike near the 2P frequency for the SOWFA-OpenFAST results. This spike is likely caused by higher levels of computed turbulence at this frequency. Edgewise bending moments compare well for all results, both for the time series and PSD results. This is expected as  
 265 which is expected considering the edgewise bending moment is dominated by gravity. All results show near-constant means and spectral content peaks at the 1P frequency. The computational results do show higher standard deviations for Tr03, which is likely due to differences in the turbine models/controllers for Tr02 and Tr03.

Shown in Figures 8(a,b) are show time-series results for the tower-base fore/aft bending moment for all computational results and experimental measurements for Tr02 and Tr03. Time-series computational results for Tr02 compare well to  
 270 experimental measurements except in the region between 8 : 30 – 9 : 00 UTC, where all computational results are nearly 30% lower than experimental measurements. This time period also corresponds to a region with sharply increasing wind speed, as shown in Figure 2. Relative results for Tr03 compare better in this time period, with the effects of wake interaction captured by all computational methods. When comparing the PSD results, there is overall good agreement for the higher-frequency content, though SOWFA-OpenFAST\_AL results tend to have higher spectral content. For experimental measurements, there  
 275 is a clear spike at 0.2 Hz, which does not correspond to an  $nP$  frequency and is not present in any computational results. This spike is likely due to a rotor imbalance present in the actual wind turbine that is not captured in the turbine model. Additionally, during the "poorer agreement" time period, the SOWFA-OpenFAST results have much higher spectral content around the 3P frequency which that is not present in the FAST.Farm or experimental results.

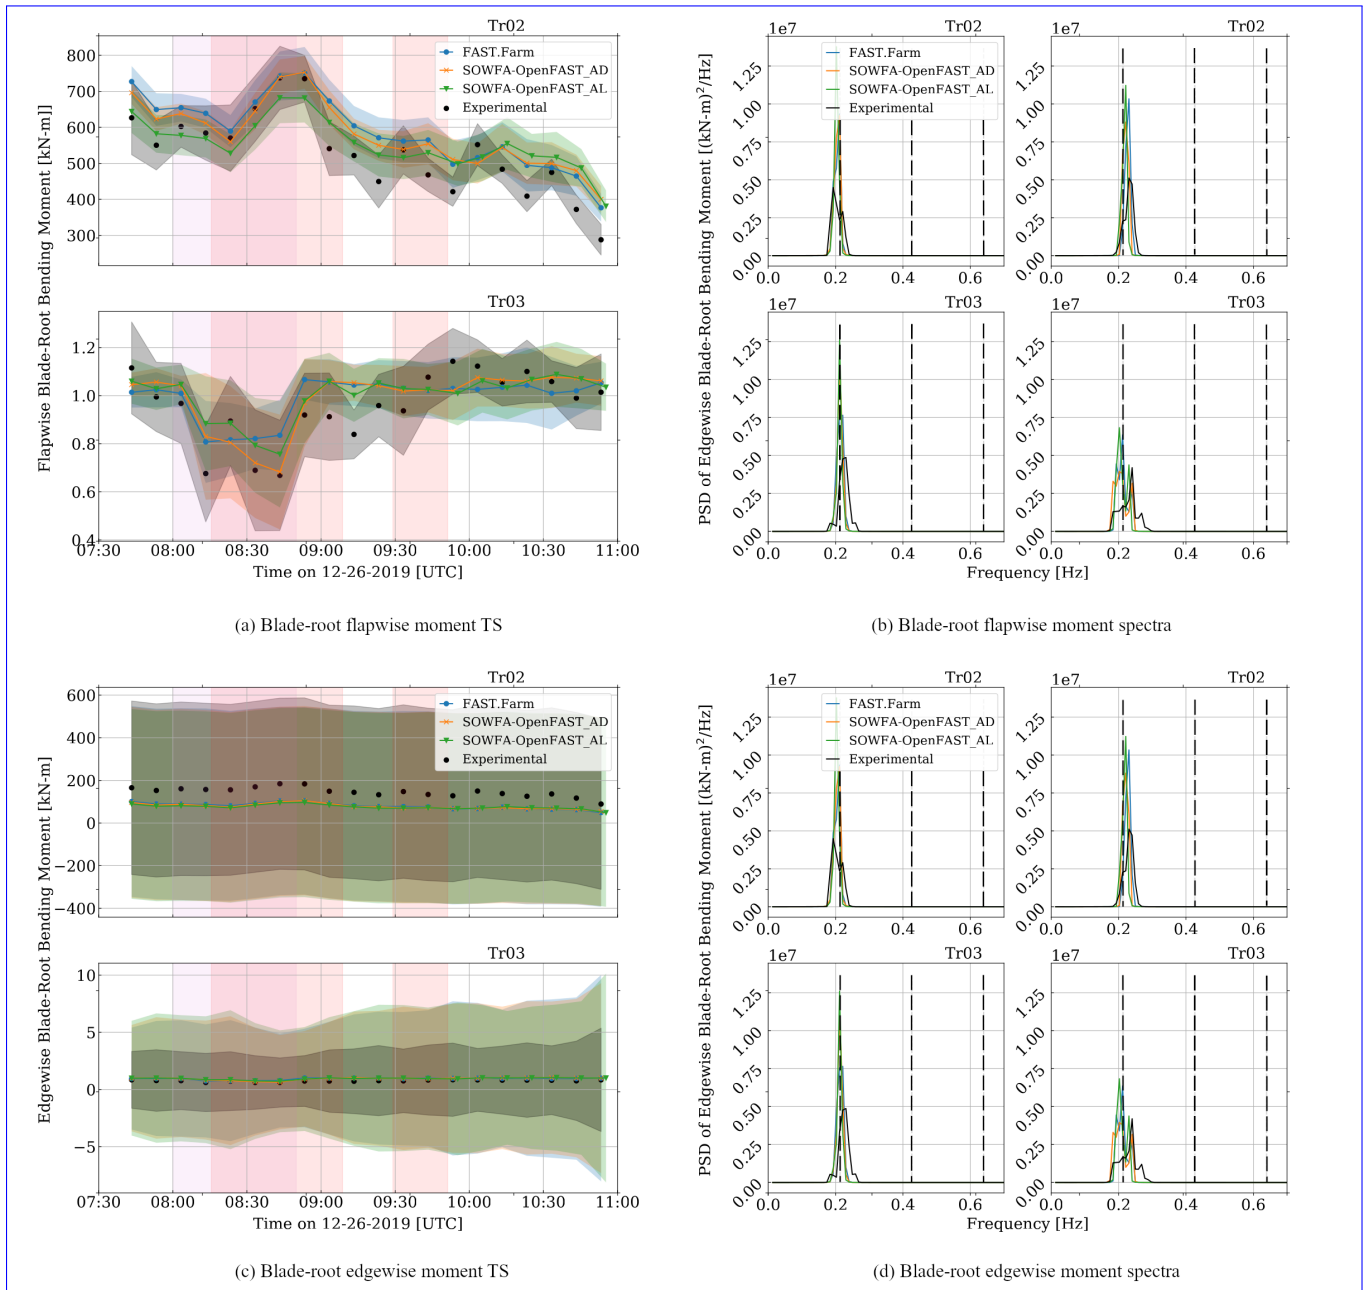

**Figure 7.** Time series (left) and PSD (right) results for blade-root flapwise (top) and edgewise (bottom) bending moments for all computational methods and experimental results. Dots show 10-minute-10 minute averages and bands extend to  $\pm 1$  standard deviation from the mean. Results from each wind turbine are shown in separate sub-figures. PSD results are shown for two 10-minute-10 minute time period periods; one with good agreement between experimental measurements and computational results (top) and one with poorer agreement (bottom). Vertical dashed lines indicate the 1P, 2P, and 3P frequencies based on the average SOWFA-OpenFAST\_AD rotor speed. Vertical shaded regions are used to show when wake steering of more than  $\pm 10^\circ$  is present (red) and when there was prominent wakening of Tr03 and Tr04 (purple).

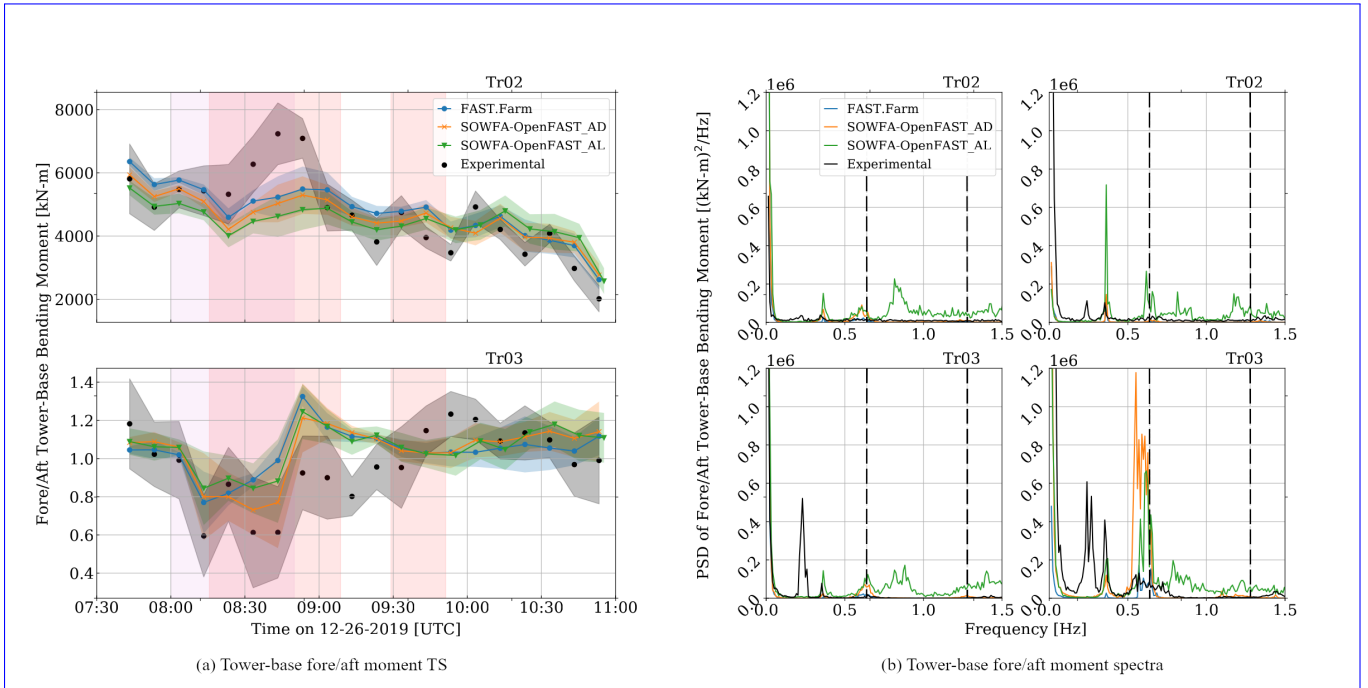

**Figure 8.** Time-series (left) and PSD (right) results of tower-base fore/aft bending moment for all computational methods and experimental results. Dots show 10-minute averages and bands extend to  $\pm 1$  standard deviation from the mean. Results from each wind turbine are shown in separate sub-figures. PSD results are shown for two 10-minute time periods; one with good agreement between experimental measurements and computational results (top) and one with poorer agreement (bottom). Vertical dashed lines indicate the 3P and 6P frequencies based on the average SOWFA-OpenFAST\_AD rotor speed. Vertical shaded regions are used to show when wake steering of more than  $\pm 10^\circ$  is present (red) and when there was prominent wakening of Tr03 and Tr04 (purple).

### 3.2 Wake Center Tracking

280 Lateral and vertical wake center tracking was performed for all wind turbines and separated into time periods with and without active wake steering. Shown in Figure ??-are-PDF-9 are probability density function (PDF) distributions for the lateral and vertical wake center location for each wind turbine at various downstream distances, relative to the wind turbine location (e.g., the results for Tr02 are relative to the location of Tr02). PDF-of-vertical-wake-center-position-for-all-turbines-Results-are-shown-for-FAST.Farm-and-SOWFA-ALM-results-and-separated-into-time-periods-without-wake-steering-(left)-and-with-wake-steering  
 285 (right).

Different wake positions are shown for each turbine based on the availability of information. Recall that Tr01, Tr02, and Tr05 are unwaked-un-waked turbines, and Tr03 and Tr04 are waked by Tr02 under certain inflow wind directions. Tr01 and Tr05 were not subject to active wake steering, and therefore have similar responses to each other at all downstream distance. At all distances, When comparing the lateral wake center positions in Figure 9(a), there is comparable agreement between

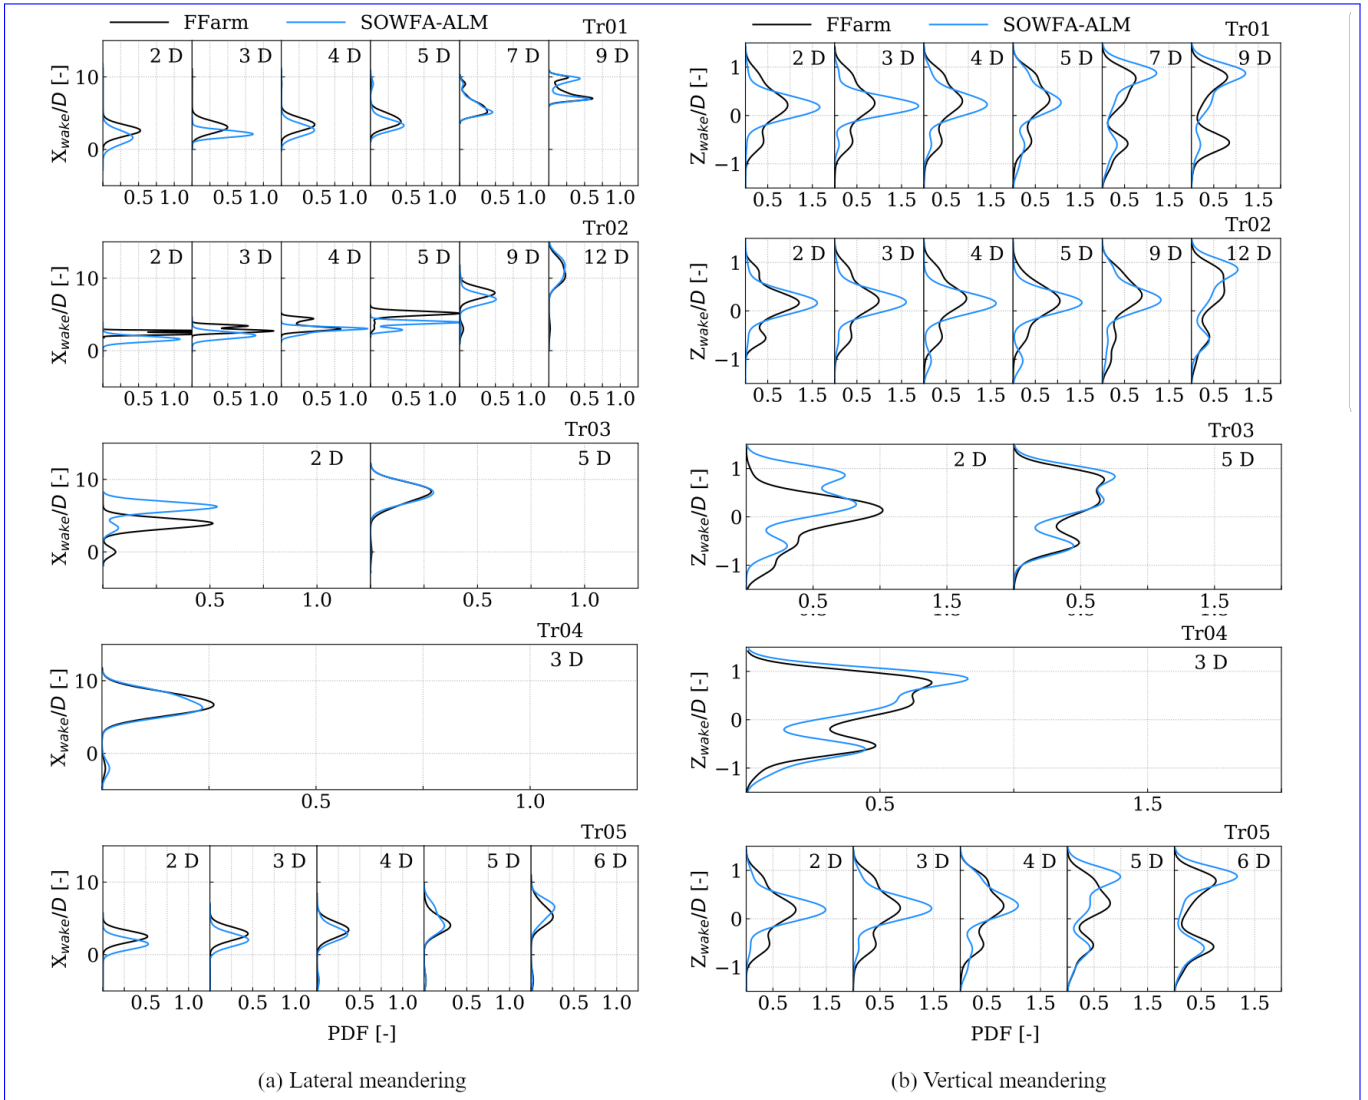

**Figure 9.** PDF of the lateral (left) and vertical (right) wake center position for all wind turbines during time periods without wake steering. Results are shown for FAST.Farm and SOWFA-ALM results and separated into time periods without wake steering (left) and with wake steering (right).

290 the FAST.Farm and SOWFA-ALM results at all distances, though FAST.Farm tends to predict more wake deflection at lower downstream distances. A bimodal wake center position is captured for both methods at 9D downstream of Tr01, but this could be due to deficiencies in the wake tracking algorithm when wake breakdown occurs. The right column in Figure ?? was subject to active wake steering, though overall results are not markedly different between the results without wake steering (left column). This is due to the changing wind direction and resulting change in turbine yaw misalignment (ranging between +5 and -10

295 degrees), which has a more pronounced impact on the wake location further downstream of the turbine and is seen developing  
by 5D downstream of Tr01. As with Tr01 and Tr05, FAST.Farm tends to predict more wake deflection at lower downstream  
distances, though for Tr02 this persists ~~further~~ further downstream. Note that Tr03 and Tr04 are located 5D and 8D downstream  
of Tr02, respectively. ~~Though SOWFA-AL~~ SOWFA-ALM results show more wake deflection ~~that than~~ FAST.Farm results at  
2D downstream of Tr03; FAST.Farm is not expected to accurately model wakes in the near region, but rather, the near-wake  
300 model of FAST.Farm exists so as to more accurately model the far wake. Further downstream of Tr03, agreement between the  
computational methods is very good at 5D downstream. ~~Agreement is also very good between the computational methods at,~~  
as well as 3D downstream of Tr04.

~~Vertical~~ The vertical wake center position results in Figure ~~??~~ 9(b) are comparable to those of the lateral wake center  
position in terms of relative difference between computational approaches. The mean wake center ~~positions~~ position agrees  
305 well between the computational methods for all turbines and downstream locations, though discrepancies in standard deviation  
are ~~seen~~ observed more for Tr01 and Tr05 results, especially close to the rotor.

Overall, though, there is strong agreement between the computational methods in the lateral and vertical wake center position  
for all turbines, especially at downstream distances outside of the ~~near-wake~~ near-wake region, or approximately more than 3D  
downstream. FAST.Farm is expected to be inaccurate at distances less than 3D downstream due to the near-wake correction  
310 used in ~~FAST.Farm that is only~~ the tool that is implemented to approximate the effect of pressure recovery on the far-wake  
solution.

~~Shown in Figure ?? are mean and standard deviations for the wake center location for each wind turbine at various~~  
~~downstream distances, relative to the wind turbine. Mean (right) and standard deviation (left) of lateral (top) and vertical~~  
~~(bottom) wake center position at each downstream distance, relative to the turbine, for all wind turbines. Results are shown for~~  
315 ~~FAST.Farm and SOWFA-ALM results.~~

## 4 Conclusions

The objective of this work was to assess the ability of FAST.Farm to accurately predict wind turbine loads and wake evolution  
in a small wind farm based on realistic atmospheric conditions, specifically a ~~nonstationary~~ non-stationary stable bound-  
ary layer. This assessment was done via a three-way comparison between FAST.Farm simulations, high-fidelity SOWFA-  
320 OpenFAST simulations, and ~~multiturbine~~ multi-turbine measurements from a subset of turbines within a full-scale wind farm,  
with the simulations driven by a high-fidelity LES precursor of a diurnal cycle derived from measurement-driven ~~MMC~~  
mesoscale-to-microscale coupling techniques. There is generally good agreement between the experimental measurements  
of turbine response ~~(power, loads)~~ in terms of power and loads with both computational methods. This agreement was shown  
for the time-series response, where the trends and value ranges were captured, as well as the PSD response for certain periods  
325 of time. Overall, there is strong agreement between the computational methods in the lateral and vertical wake center position  
for all turbines, especially at downstream distances outside of the ~~near-wake~~ near-wake region, or approximately more than 3D

downstream. This [finding](#) demonstrates the importance and power of creating highly accurate atmospheric inflow conditions for ~~the~~ use in validation studies.

330 [Considering that FAST.Farm is much less computationally expensive than SOWFA-OpenFAST, this three-way validation effort provides further confidence to apply FAST.Farm to the calculation of wind turbine power production and structural loading in wind farm settings, including wake interactions between turbines.](#)

*Author contributions.* KS led the loads and wakes comparison studies and ran all FAST.Farm simulations. EQ led the inflow generation and SOWFA simulations, and assisted in the experimental data post-processing. HI was involved in the experimental loads campaign and assisted in the experimental data post-processing. JJ supervised the validation effort. KS prepared the article, with support from EQ, HI, and JJ.

335 *Competing interests.* The authors declare that they have no conflict of interest.

*Disclaimer.* This work was authored by the National Renewable Energy Laboratory, operated by Alliance for Sustainable Energy, LLC, for the U.S. Department of Energy (DOE) under Contract No. DE-AC36-08GO28308. Funding provided by the U.S. Department of Energy Office of Energy Efficiency and Renewable Energy Wind Energy Technologies Office. The views expressed in the article do not necessarily represent the views of the DOE or the U.S. Government. The U.S. Government retains and the publisher, by accepting the article for  
340 publication, acknowledges that the U.S. Government retains a nonexclusive, paid-up, irrevocable, worldwide license to publish or reproduce the published form of this work, or allow others to do so, for U.S. Government purposes.

*Acknowledgements.* ~~This work was authored by the National Renewable Energy Laboratory, operated by Alliance for Sustainable Energy, LLC, for the U.S. Department of Energy (DOE) under Contract No. DE-AC36-08GO28308. Funding provided by the U.S. Department of Energy Office of Energy Efficiency and Renewable Energy Wind Energy Technologies Office. The views expressed in the article do not necessarily represent the views of the DOE or the U.S. Government. The U.S. Government retains and the publisher, by accepting the article for publication, acknowledges that the U.S. Government retains a nonexclusive, paid-up, irrevocable, worldwide license to publish or reproduce the published form of this work, or allow others to do so, for U.S. Government purposes.~~  
345

The research was performed using computational resources sponsored by ~~the Department of Energy~~ [DOE](#)'s Office of Energy Efficiency and Renewable Energy and located at the National Renewable Energy Laboratory.



## 350 References

- Asmuth, H., Diaz, G. P. N., Madsen, H. A., and et al.: Wind Turbine Response in Waked Inflow: A Modelling Benchmark Against Full-Scale Measurements, *Renewable Energy*, pp. 1–44, <https://doi.org/https://doi.org/10.1016/j.renene.2022.04.047>, 2022.
- Doubrawa, P., Quon, E., Martinez, T., Shaler, K., and et al.: Multi-Model Validation of Single Wakes in Neutral and Stratified Atmospheric Conditions, *Wind Energy*, [https://doi.org/10.1002/\(ISSN\)1099-1824](https://doi.org/10.1002/(ISSN)1099-1824), 2020.
- 355 Fleming, P., King, J., Dykes, K., and et al.: Initial Results from a Field Campaign of Wake Steering Applied at a Commercial Wind Farm: Part 1, *Wind Energy Science*, pp. 273–285, <https://doi.org/https://doi.org/10.5194/wes-4-273-2019>, 2019.
- Fleming, P., King, J., Simley, E., and et al.: Continued Results from a Field Campaign of Wake Steering Applied at a Commercial Wind Farm: Part 2, *Wind Energy Science*, pp. 945–958, <https://doi.org/https://doi.org/10.5194/wes-5-945-2020>, 2020.
- Ivanov, H., Dana, S., and Doubrawa, P.: Loads Response That is Due to Wake Steering on a Pair of Utility-Scale Wind Turbines, Tech. Rep. NREL/TP-5000-79187, National Renewable Energy Laboratory, Golden, CO, 2021.
- 360 Jonkman, J. and Shaler, K.: FAST.Farm User’s Guide and Theory Manual, Tech. Rep. NREL/TP-5000-78485, National Renewable Energy Laboratory, Golden, CO, 2021.
- Jonkman, J., Doubrawa, P., Hamilton, N., and et al.: Validation of FAST.Farm Against Large-Eddy Simulations, TORQUE 2018, EAWE, Milano, Italy, 2018.
- 365 Kretschmer, M., Jonkman, J., Pettas, V., and Cheng, P. W.: FAST.Farm Load Validation for Single Wake Situations at Alpha Ventus, *Wind Energy Science*, pp. 1247–1262, <https://doi.org/https://doi.org/10.5194/wes-6-1247-2021>, 2021.
- Larsen, G. C., Madsen, H. A., Thomsen, K., and et al.: Wake Meander: A Pragmatic Approach, *Wind Energy*, 11, 337–95, <https://doi.org/http://onlinelibrary.wiley.com/doi/10.1002/we.267/epdf>, 2008.
- NREL: OpenFAST. Version 3.0.0, <http://github.com/OpenFAST/openfast>, 2021a.
- 370 NREL: ROSCO. Version 2.4.1, <https://github.com/NREL/ROSCO>, 2021b.
- Quon, E.: SAMWICH Wake-Tracking Toolbox, <https://github.com/ewquon/waketracking>, 2017.
- Quon, E.: Measurement-Driven Large-Eddy Simulations of a Diurnal Cycle During a Wake Steering Field Campaign, Submitted to *Wind Energy Science*, <https://doi.org/10.5194/wes-2023-101>, 2023.
- Quon, E., Doubrawa, P., and Debnath, M.: Comparison of Rotor Wake Identification and Characterization Methods for the Analysis of Wake Dynamics and Evolution, *Journal of Physics: Conference Series*, 1452, <https://doi.org/10.1088/1742-6596/1452/1/012070>, 2019.
- 375 Shaler, K. and Jonkman, J.: FAST.Farm Development and Verification of Structural Load Predictions Against Large Eddy Simulations, *Wind Energy*, pp. 428–449, <https://doi.org/10.1002/we.2581>, 2021.
- Shaler, K., Jonkman, J., Doubrawa, P., and Hamilton, N.: FAST.Farm Response of Varying Wind Inflow Techniques, in: AIAA SciTech Forum, 37th Wind Energy Symposium, AIAA, San Diego, CA, <https://doi.org/https://arc.aiaa.org/doi/pdf/10.2514/6.2019-2086>, 2019.
- 380 Shaler, K., Debnath, M., and Jonkman, J.: Validation of FAST.Farm Against Full-Scale Turbine SCADA Data for a Small Wind Farm, *Journal of Physics: Conference Series*, 1618, <https://doi.org/10.1088/1742-6596/1618/6/062061>, 2020.
